# Supplementary material
Source: PubMed Central journal article supplement (PMC3669183)
Supplement: auto-9-743-s01.pdf [file auto-9-743-s01.pdf]

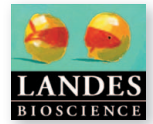

## **Supplemental Material to:**

**Xingguo Song, Xia Zhang, Xiaoyan Wang, Faliang Zhu,  
Chun Guo, Qun Wang, Yongyu Shi, Jianing Wang,  
Youhai Chen and Lining Zhang**

**Tumor suppressor gene PDCD4 negatively  
regulates autophagy by inhibiting the expression  
of autophagy-related gene ATG5**

**Autophagy 2013; 9(5)**

**<http://dx.doi.org/10.4161/auto.24069>**

**[www.landesbioscience.com/journals/autophagy/article/24069](http://www.landesbioscience.com/journals/autophagy/article/24069)**

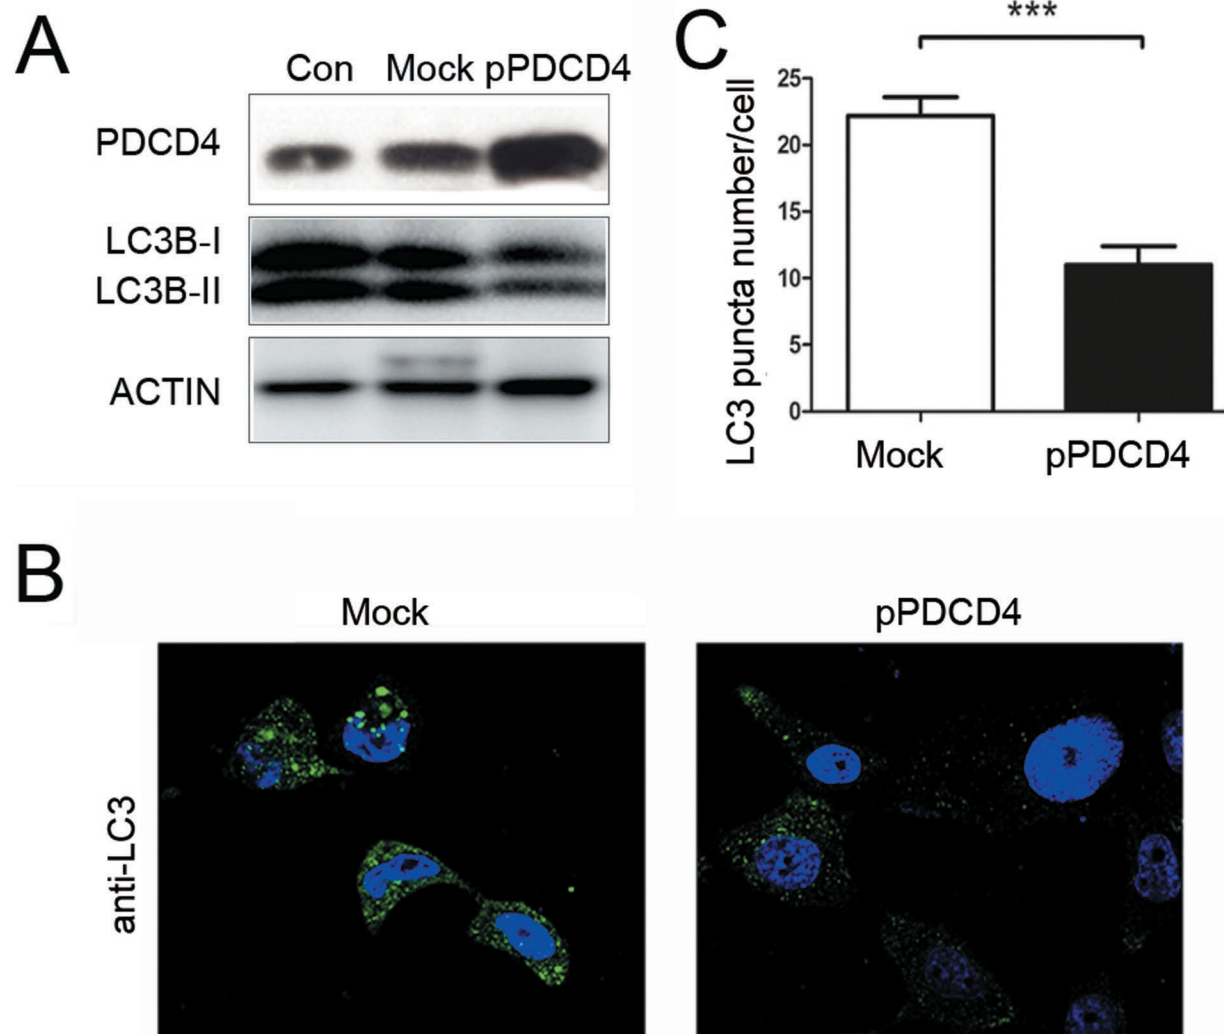

Figure S1

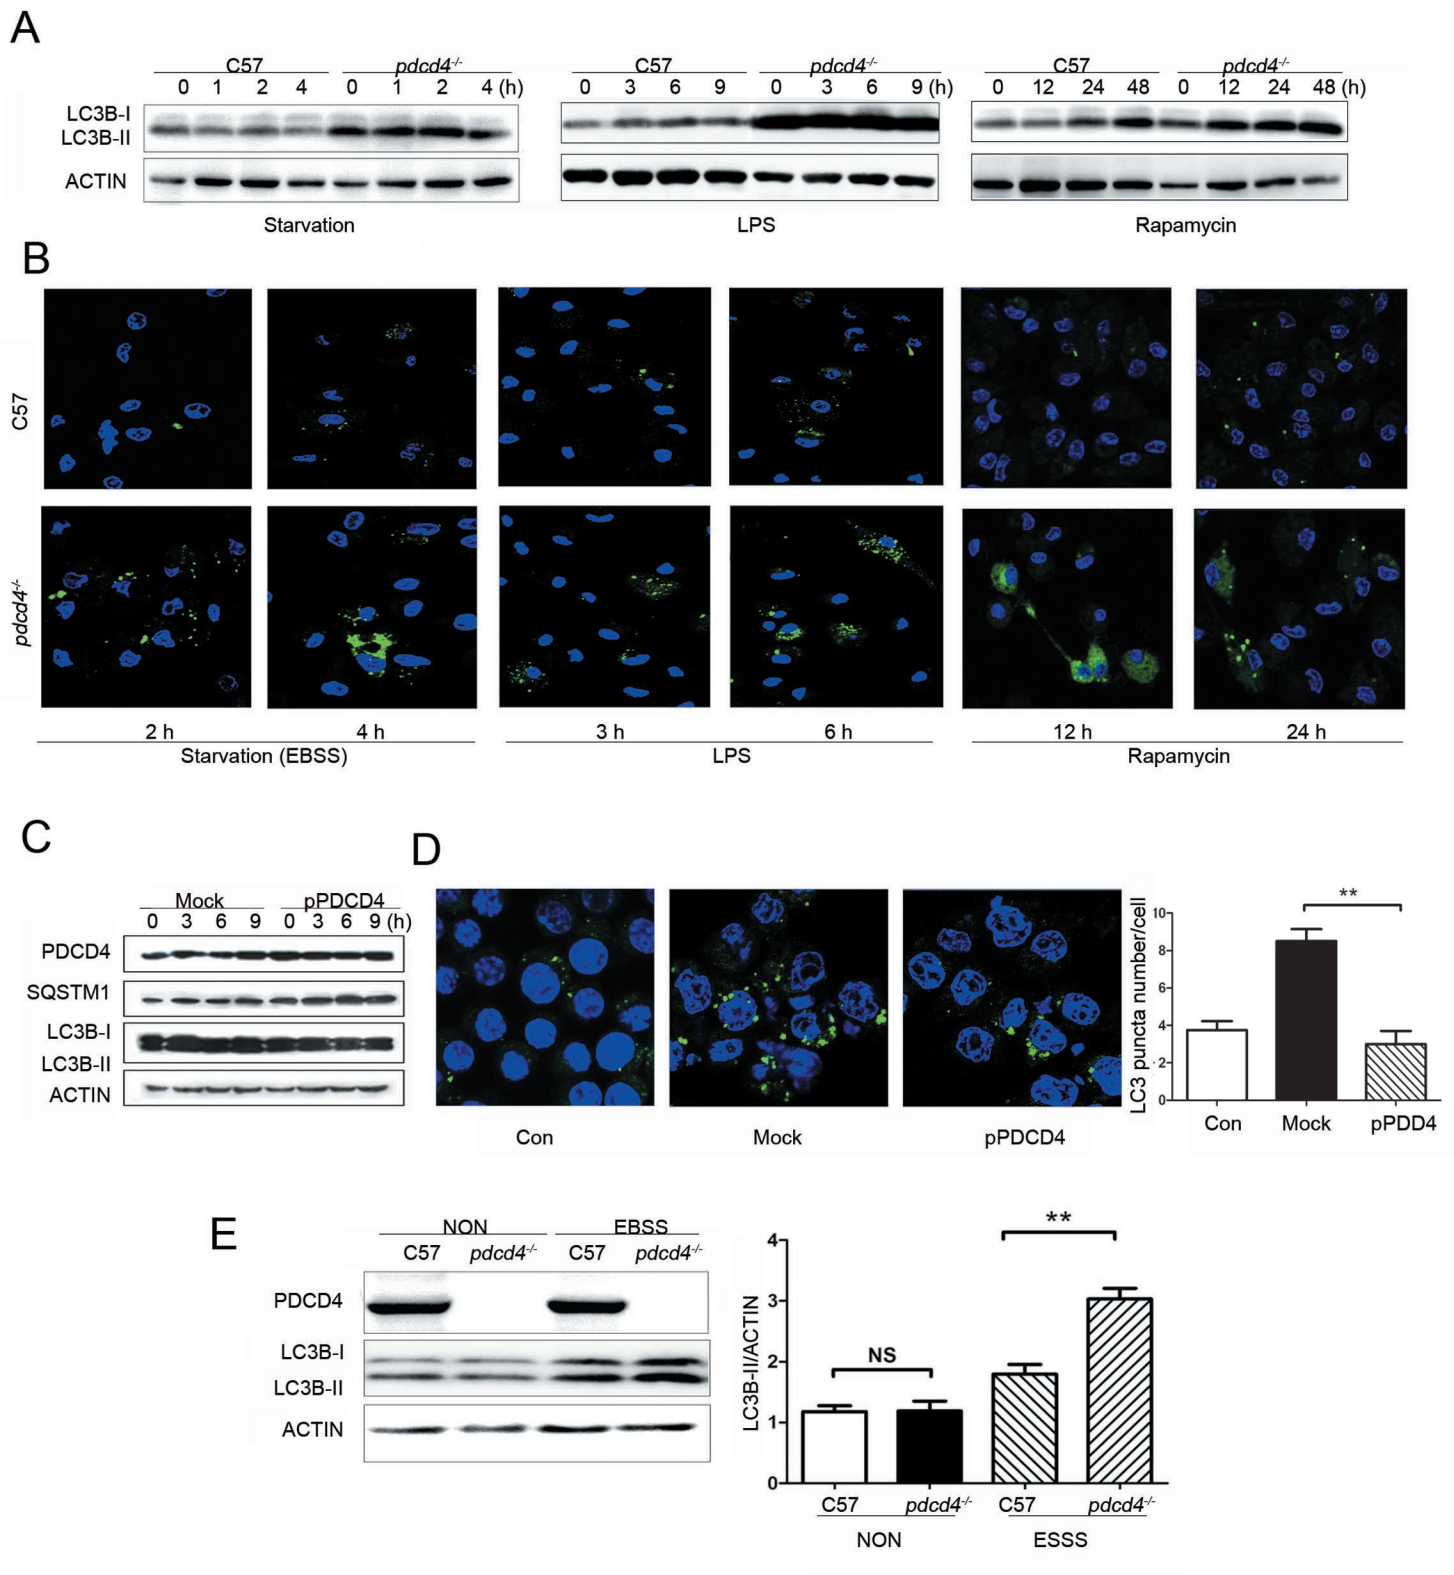

Figure S2

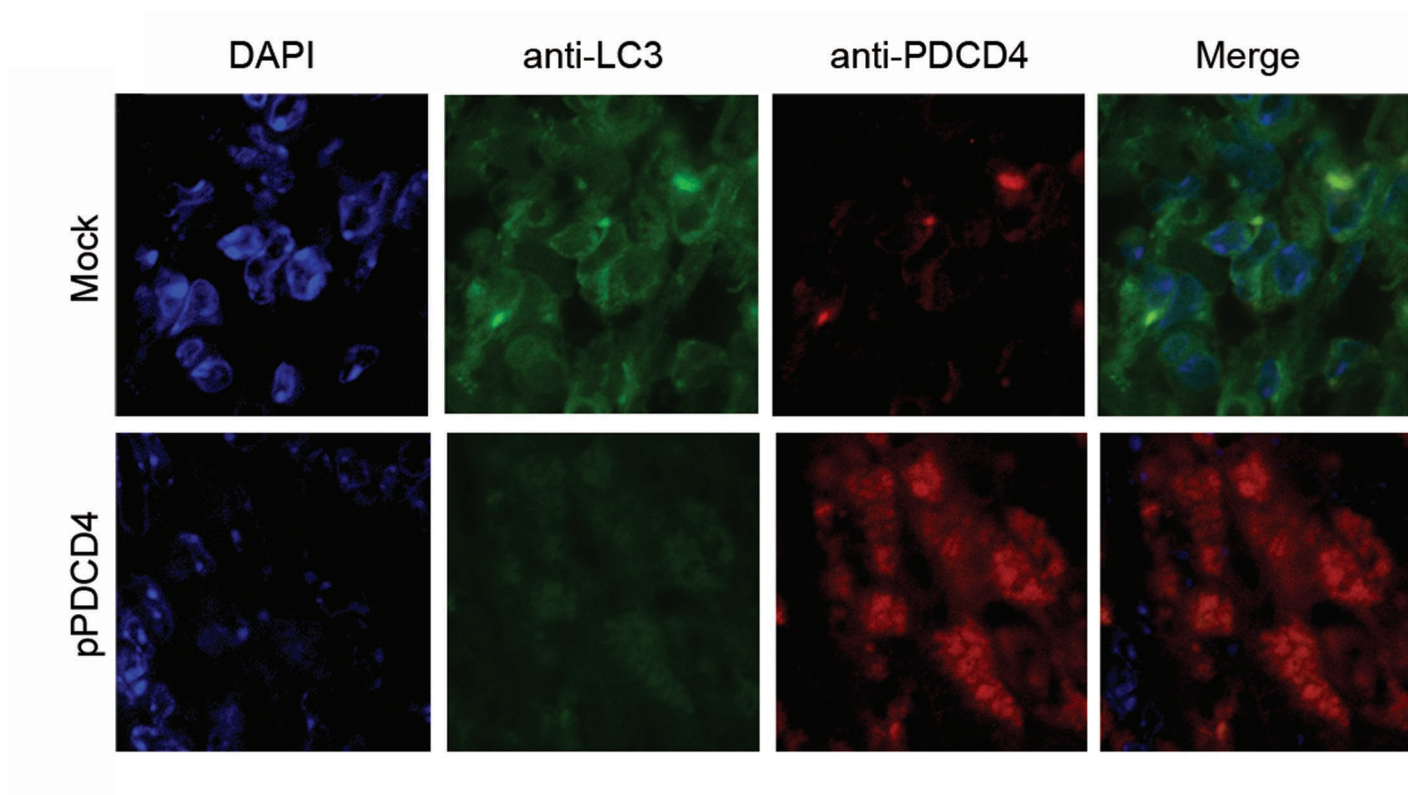

Figure S3

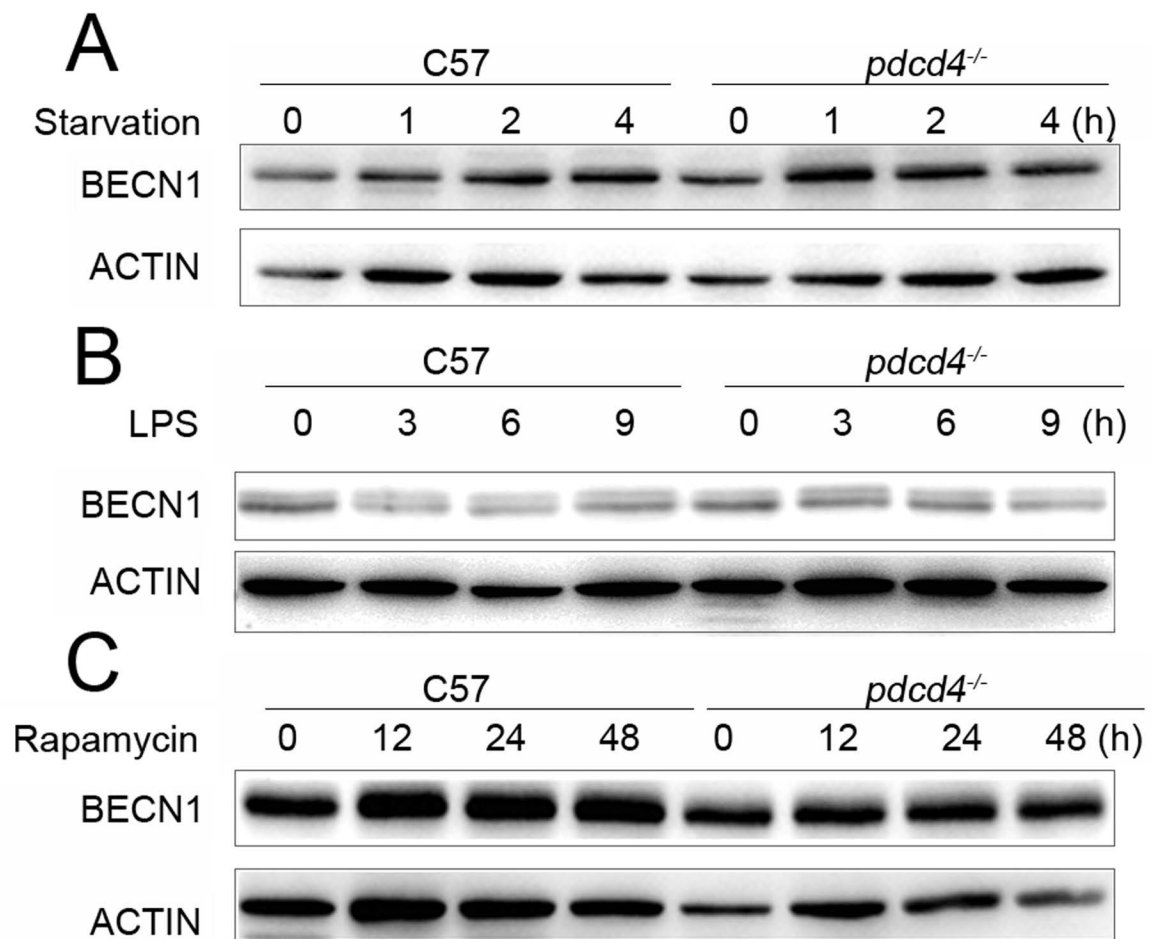

Figure S4

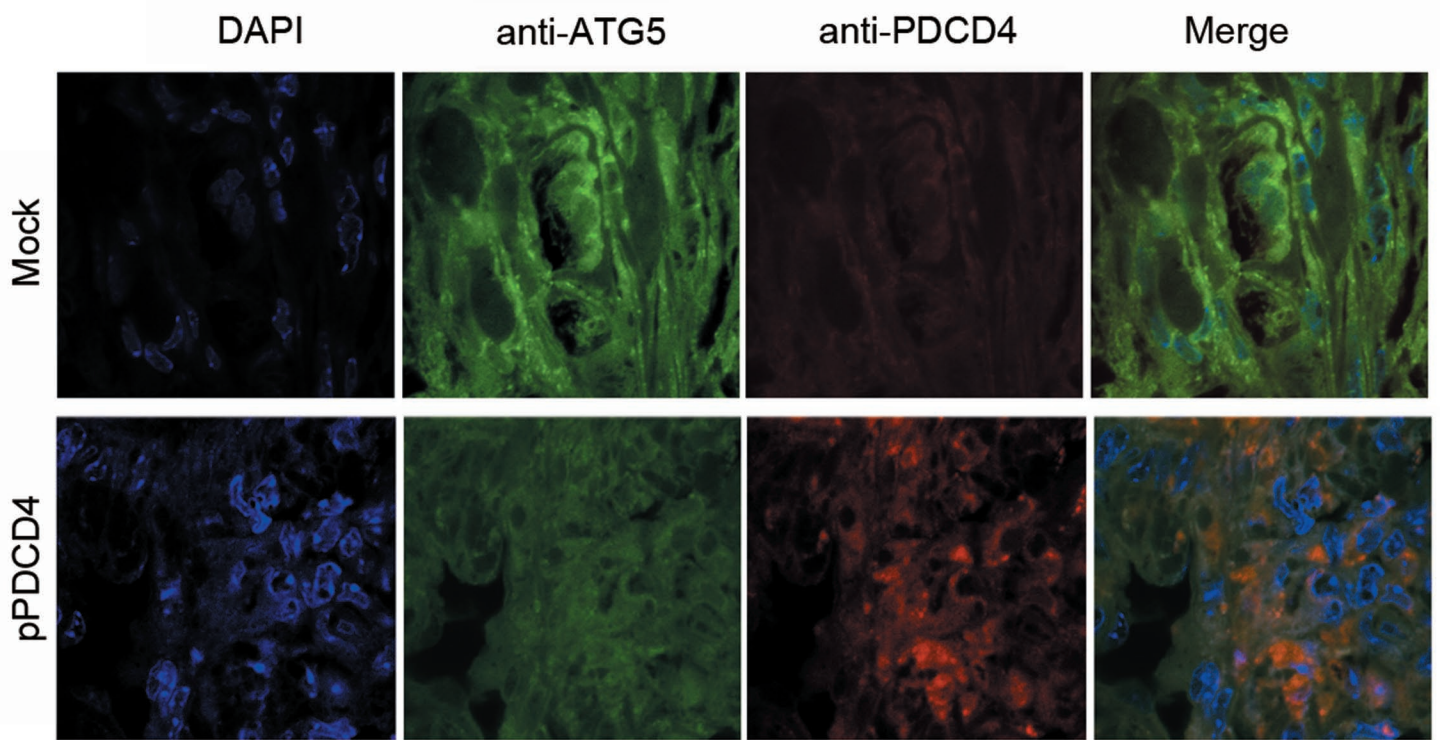

Figure S5

**Figure S1.** PDCD4 suppresses autophagy in Caov3 cells. Caov3 cells were transfected using *pDsRed2-N1* (Mock) and *pDsRed2-N1-PDCD4* (pPDCD4) plasmids. Twenty-four hours later after starvation for 2 h, **(A)** cells were subjected to western blot analysis to demonstrate PDCD4, LC3B-I/LC3B-II expression in Caov3 cells. **(B and C)** LC3 puncta were detected by immunofluorescence under confocal laser microscopy and quantified as described above. The results shown are means  $\pm$  SD; \*\* $p < 0.01$

**Figure S2.** PDCD4 suppresses autophagy in immune cells. **(A and B)** Primary peritoneal macrophages from C57BL/6J (C57) or *Pdcd4* knockout (*pdcd4*<sup>-/-</sup>) mice were starved, or treated with LPS, or rapamycin respectively. **(A)** LC3B-I/LC3B-II expression level was detected by western blot analysis. **(B)** The cells were inspected under confocal laser microscopy to detect LC3 puncta by immunofluorescence. **(C and D)** RAW264.7 cells were transfected using *pDsRed2-N1* (Mock) and *pDsRed2-N1-PDCD4* (pPDCD4) plasmids, 24 h later, treated with LPS. **(C)** Western blot analysis demonstrated LC3B-I/LC3B-II expression. **(D)** The cells were inspected under confocal laser microscopy to detect LC3 puncta by immunofluorescence. LC3 puncta per cell were quantified as described above. The results shown are means  $\pm$  SD; \*\* $p < 0.01$ . **(E)** Spleen cells from C57 and *pdcd4*<sup>-/-</sup> mice were isolated and cultured for 24 h to discharge adhesive macrophages. The suspension lymphocytes were collected and treated with or without EBSS for another 24 h, and then subjected to western bolt analysis. PDCD4, LC3B-I/LC3B-II expression were detected. Data were quantified by Quantity One. The results shown are means  $\pm$  SD; \*\* $p < 0.01$ .

**Figure S3.** Colocalization between PDCD4 and LC3 in murine xenograft tumors. Xenograft tumors paraffin sections treated by injection with mock vector (Mock), PDCD4 plasmid (pPDCD4) were stained using an anti-PDCD4 antibody followed by a Rhodamine-conjugated secondary antibody (Red) and LC3 puncta using an anti-LC3 antibody followed by a FITC-conjugated secondary antibody (green).

**Figure S4.** PDCD4 suppresses autophagy in a BECN1-independent manner in immune cells. Primary peritoneal macrophages from C57BL/6J (C57) or *Pdcd4* knockout (*pdcd4*<sup>-/-</sup>) mice were subjected to starvation (A), LPS (B), rapamycin (C) respectively, and subjected to western blot analysis to detect BECN1 protein level.

**Figure S5.** PDCD4 suppresses ATG5 expression in in murine xenograft tumors. Xenograft tumors paraffin sections of nude mice treated by injection with mock vector (Mock), PDCD4 plasmid (pPDCD4) respectively were inspected to IF to detect PDCD4 using an anti-PDCD4 antibody followed by a Rhodamine-cojugated secondary antibody and ATG5 using an anti-ATG5 antibody followed by a FITC-conjugated secondary antibody.
